# Supplementary material
Source: PubMed Central journal article supplement (PMC2711664)

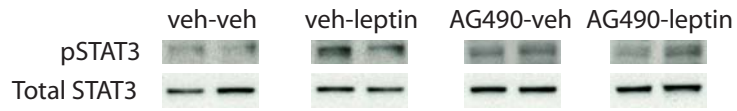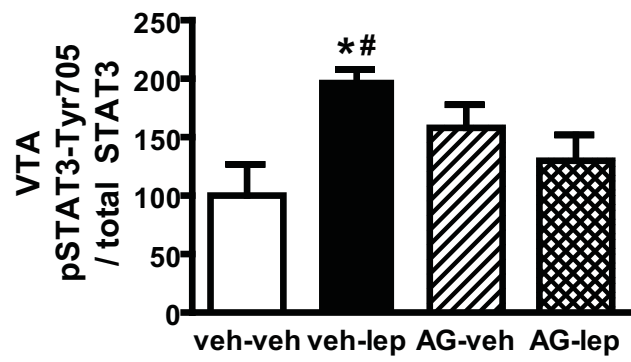

Supplement: 90865.2008_1.pdf [file 90865.2008_1.pdf]
